# Supplementary material
Source: MDPI journal article supplement (https://www.mdpi.com/2076-3417/12/1/457)

Figure S1: Operational-technological processes graph – solved part of Vysočina Region – weekends

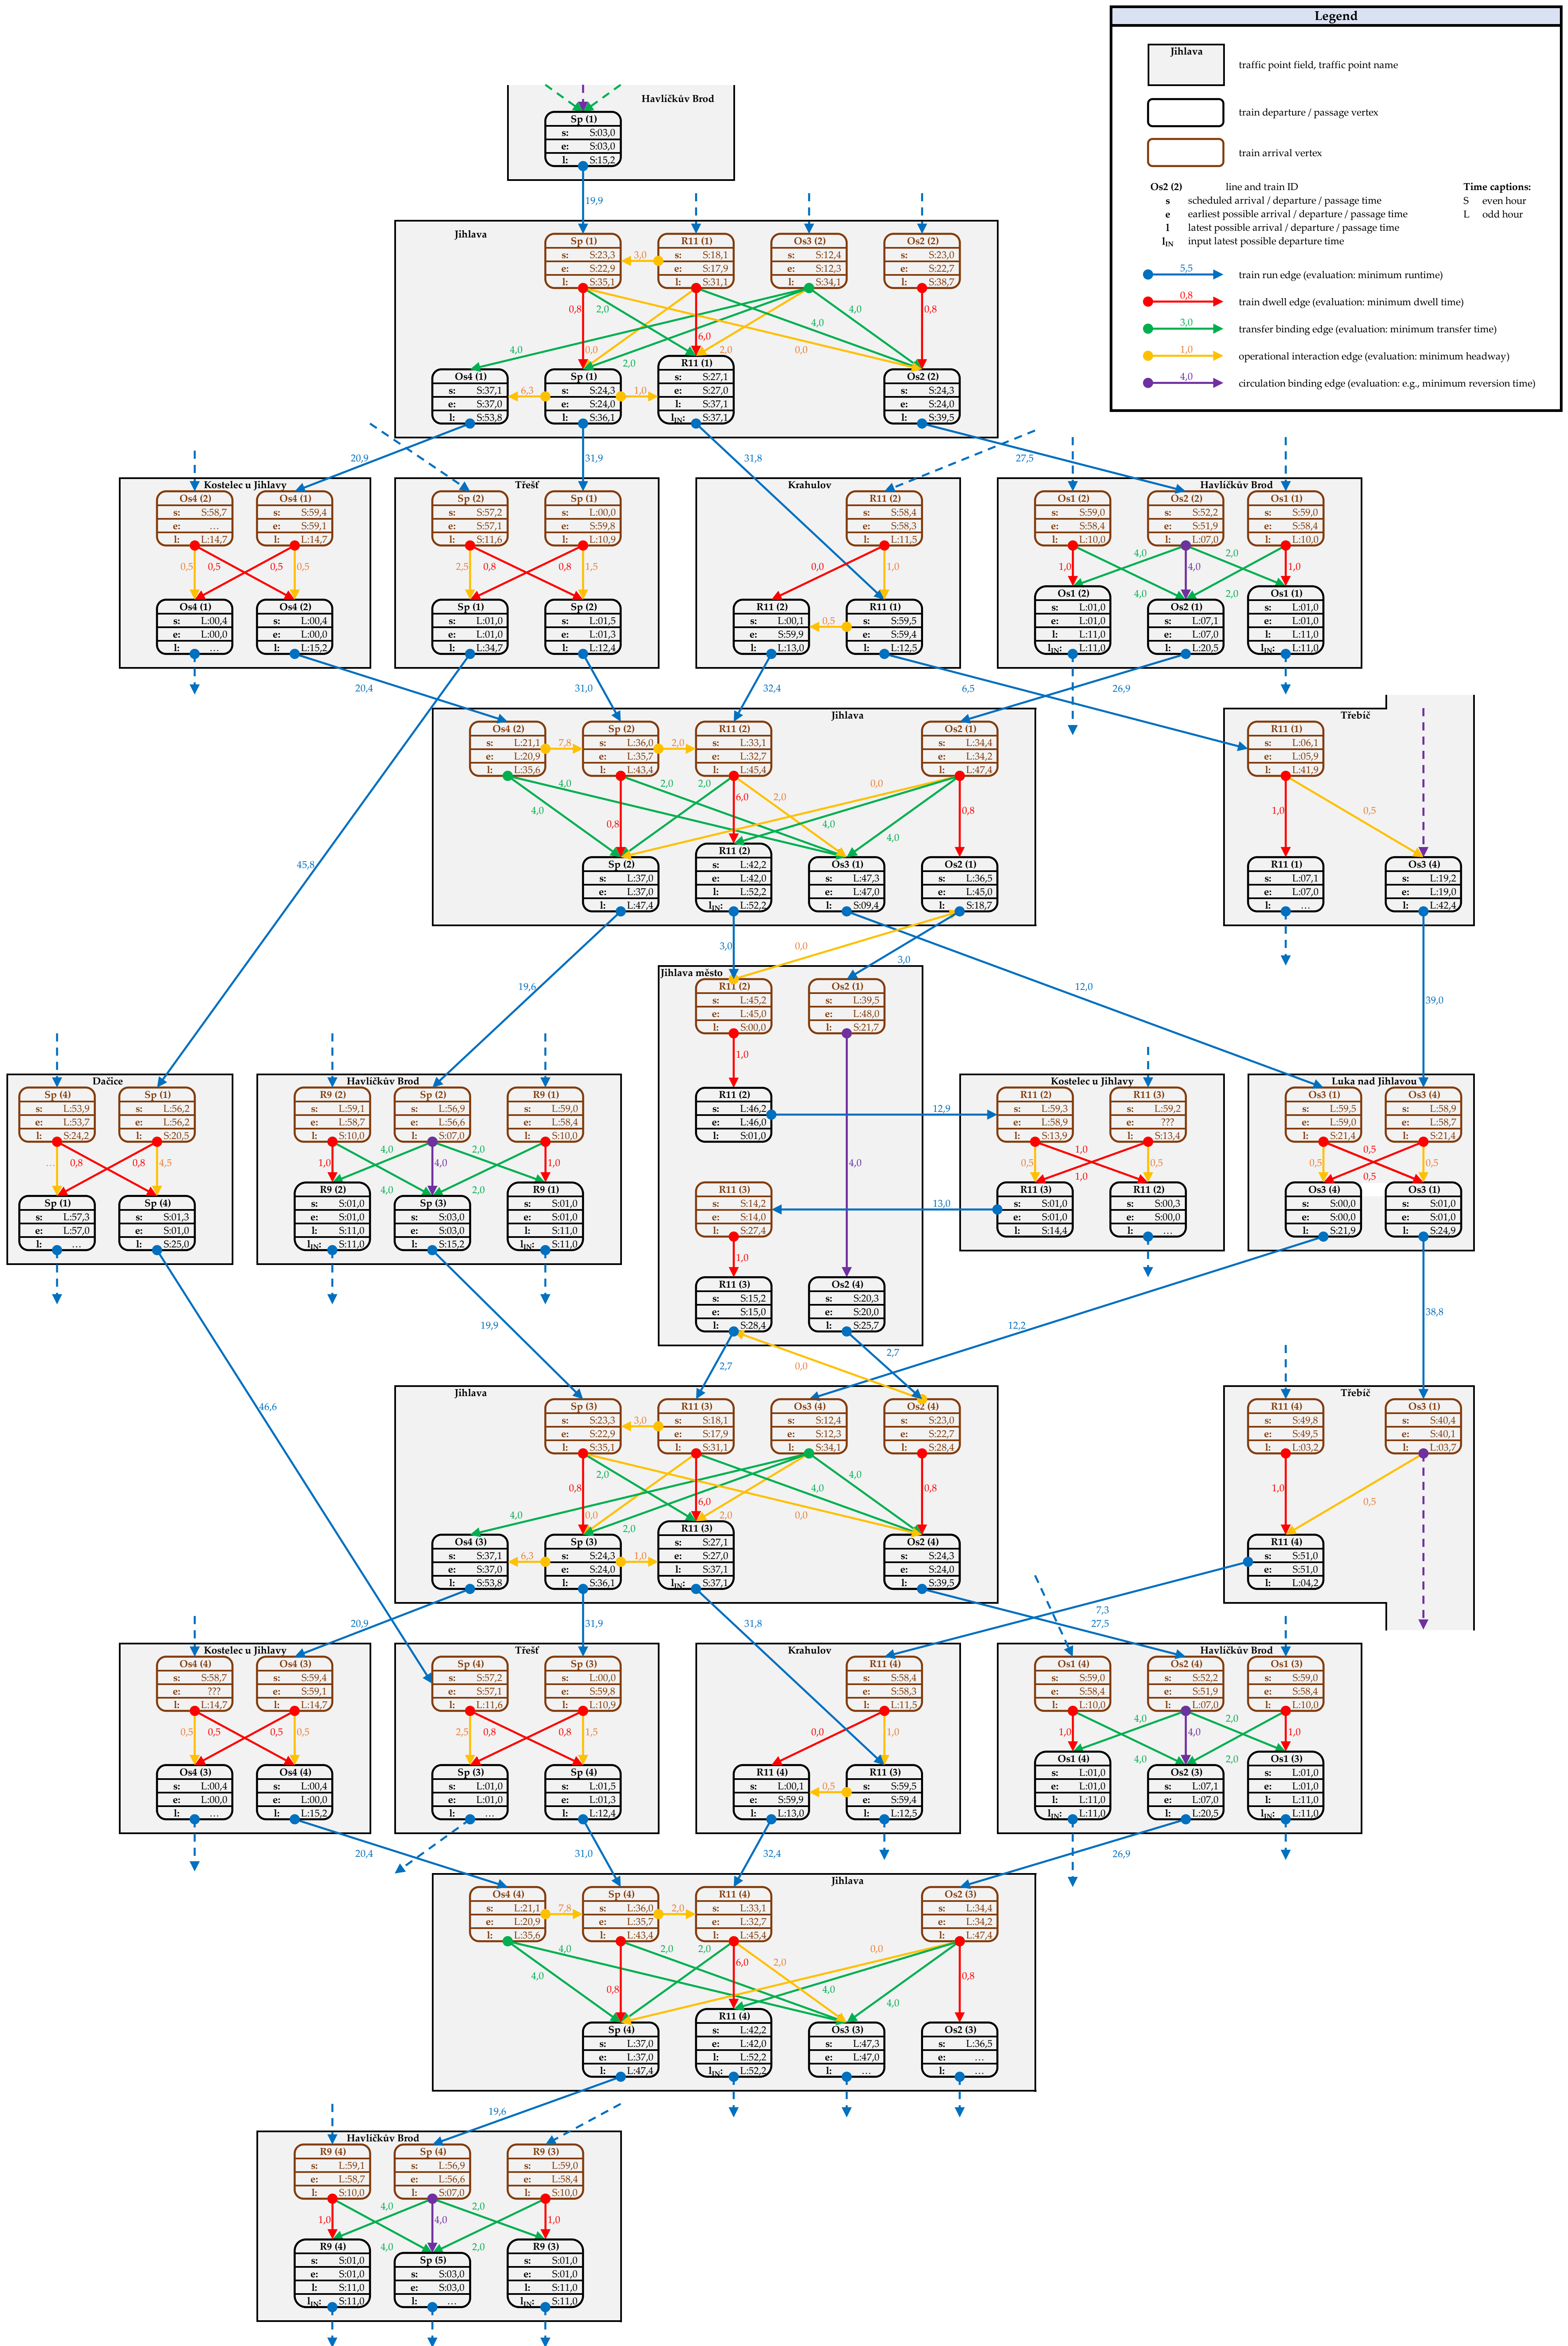

Supplement: s1 [file s1]
